# Supplementary material
Source: ML conference proceedings conference paper supplement (https://proceedings.mlr.press/v70/pennington17a.html)
Supplement: Supplementary file [file pennington17a-supp.pdf]

# Supplemental Material: Geometry of Neural Network Loss Surfaces via Random Matrix Theory

## 1. Computing the normalized index

One way to obtain an expression for the normalized index is to rewrite eqn. (18) as  $f(G) = z$  (where  $f(G) = \mathcal{R}_H(G) + 1/G$ ), so that  $G = f^{-1}(z)$ . Integrating the inverse of a function requires only integration of the function itself (Laisant, 1905),

$$\int f^{-1}(z)dz = z f^{-1}(z) - F \circ f^{-1}(z) + C, \quad (\text{S1})$$

where  $F$  is the antiderivative of  $f$ . This relation gives,

$$\alpha(\epsilon, \phi) = 1 - \frac{1}{\pi} \text{Im} \left[ \epsilon G_H(0)^2 + \log G_H(0) - \log(1 - \phi G_H(0)) / \phi \right]. \quad (\text{S2})$$

An explicit representation of  $G_H(0)$  and thus  $\alpha(\epsilon, \phi)$  is possible by solving the cubic equation in eqn. (18). The full result is very long and unenlightening, but we find that for small  $\alpha$ ,

$$\alpha(\epsilon, \phi) \approx \alpha_0(\phi) \left| \frac{\epsilon - \epsilon_c}{\epsilon_c} \right|^{3/2}, \quad \epsilon_c = \frac{1}{16} (1 - 20\phi - 8\phi^2 + (1 + 8\phi)^{3/2}), \quad (\text{S3})$$

where  $\epsilon_c$  is the critical value of  $\epsilon$  below which all critical points are minimizers.

## 2. On the assumption that the weights are I.I.D. random normal variables

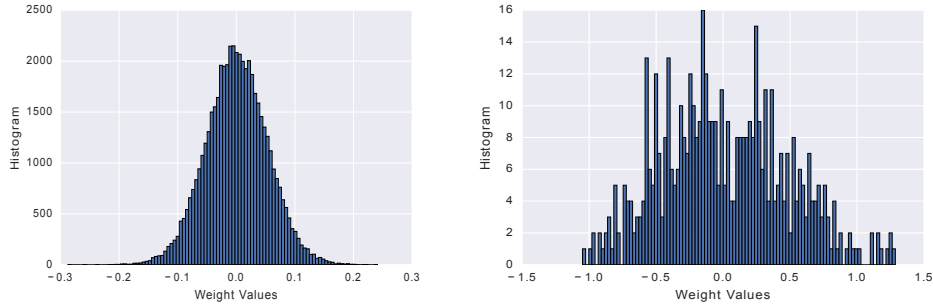

Figure S1. Histogram of weight matrix entries ( $W^{(1)}$  left,  $W^{(2)}$  right) after training a 50 hidden-unit single-layer ReLU network on a subset of 500 grayscale CIFAR-10 images. Left, right histograms have a total of 51,200 and 500 entries.

## 3. Spectral density of $H_1$ for single-hidden-layer ReLU networks

From (Dupic & Castillo, 2014) and referring to eqn. (27), the density can be written as

$$\rho_{H_1}(\lambda) = \left(1 - \min\left(1, \frac{\alpha}{2}\right)\right) \delta(\lambda) + \frac{\alpha^2 |\lambda|}{2\epsilon} \rho_c\left(\frac{\alpha^2 \lambda^2}{2\epsilon}, \frac{\alpha}{2}\right), \quad (\text{S4})$$

where  $1/\alpha = \phi/2 = n/m$ ,

$$\rho_c(x, \alpha) = \frac{\sqrt{3}}{6\pi x \sqrt[3]{2}} (r_+ - r_-) \mathbf{1}_{x \in [\theta(1-\alpha)x_-, x_+]}, \quad (\text{S5})$$

and,

$$r_{\pm} = \sqrt[3]{9(2+\alpha)(x - \xi_0) \pm 6\sqrt{3}(x - x_-)x(x_+ - x)}, \quad (\text{S6})$$

$$x_{\pm} = \frac{8 + 20\alpha - \alpha^2 \pm \sqrt{\alpha}(8 + \alpha)^{3/2}}{8}, \quad (\text{S7})$$

$$\xi_0 = -\frac{2(-1 + \alpha)^3}{9(2 + \alpha)}. \quad (\text{S8})$$

#### 4. Free independence and the evolution of eigenvalues over training

We plot the eigenvalues of the Hessian  $H_0 + H_1$  and the transformed Hessian  $H_0 + QH_1Q^T$  as the parameters evolve over training. The training set is CIFAR-10 downsampled to  $4 \times 4$  images, grayscale and whitened. We train a 16-20-16 ReLU autoencoding network without biases on the first 150 images of the dataset using full-batch gradient descent with learning rate 0.05. The parameters are initialized as zero-mean Gaussians with variance 2 over the number of incoming units.

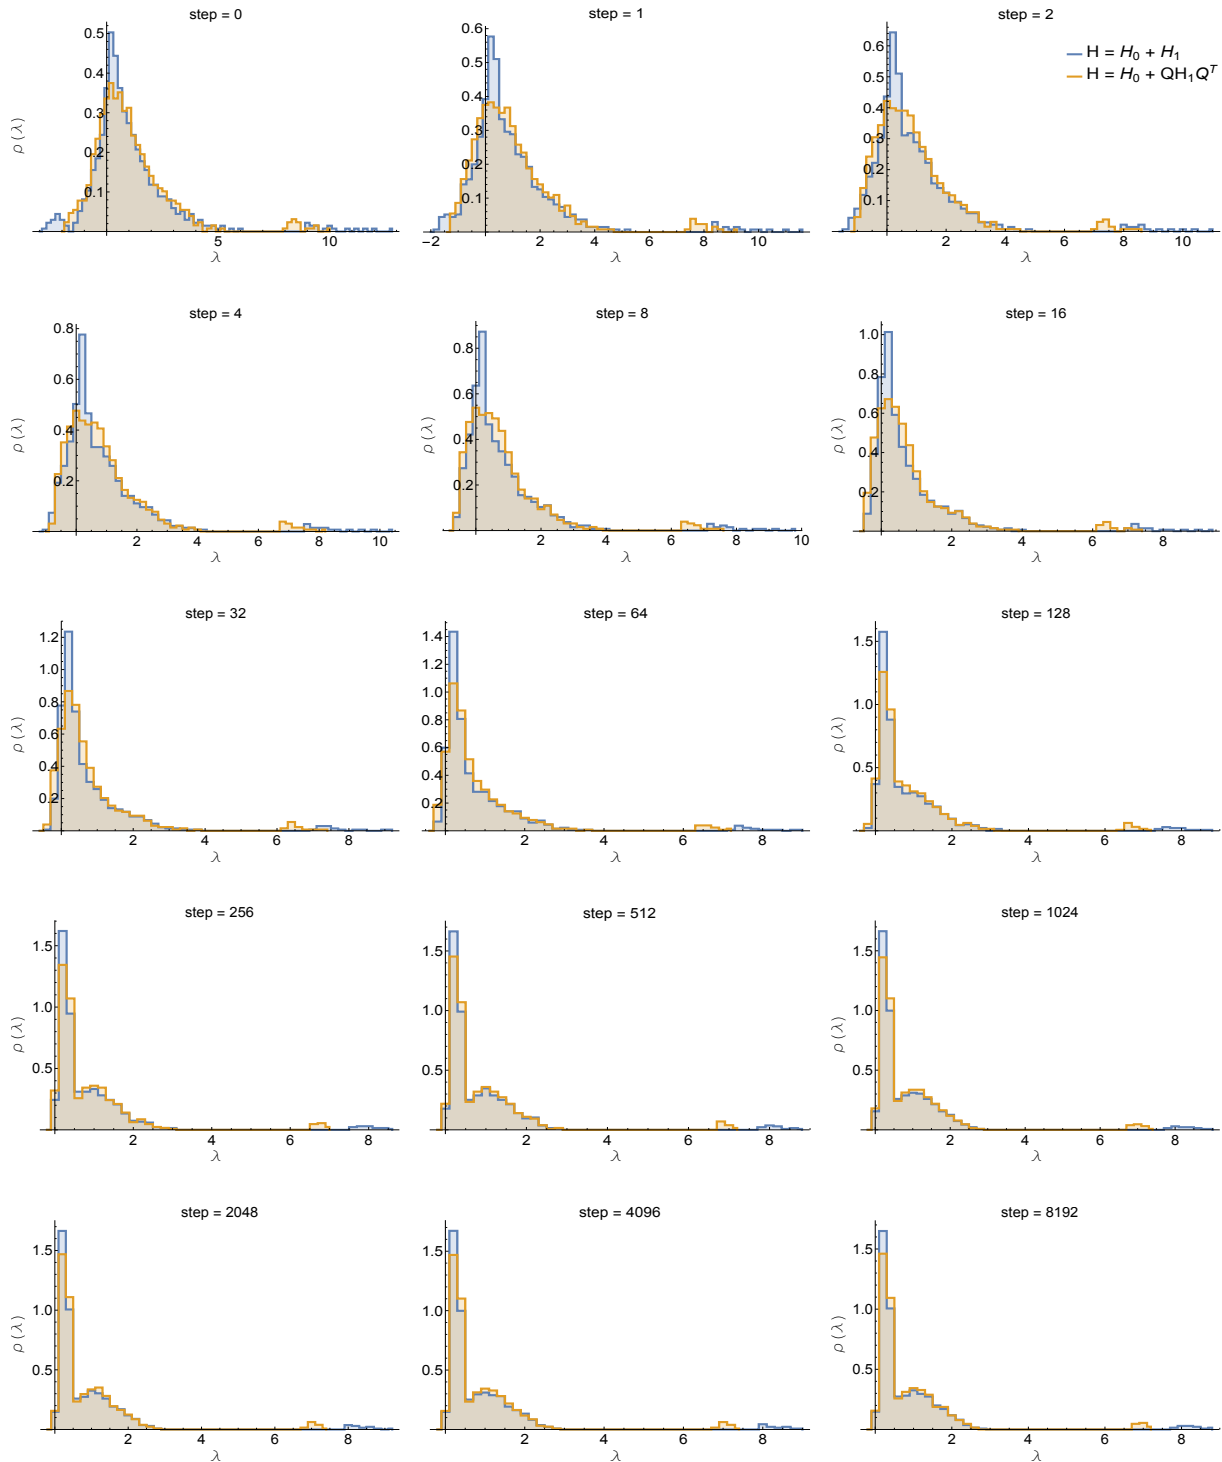

Figure S2. Evolution of the eigenvalues of the Hessian over training.
